# Supplementary material for: Identification of Epithelial-Mesenchymal Transition- (EMT-) Related LncRNA for Prognostic Prediction and Risk Stratification in Esophageal Squamous Cell Carcinoma
Source: Hindawi journal article supplement (doi:10.1155/2021/5340240), 2021-10-19
Supplement: f1 [file 5340240.f1.pdf]

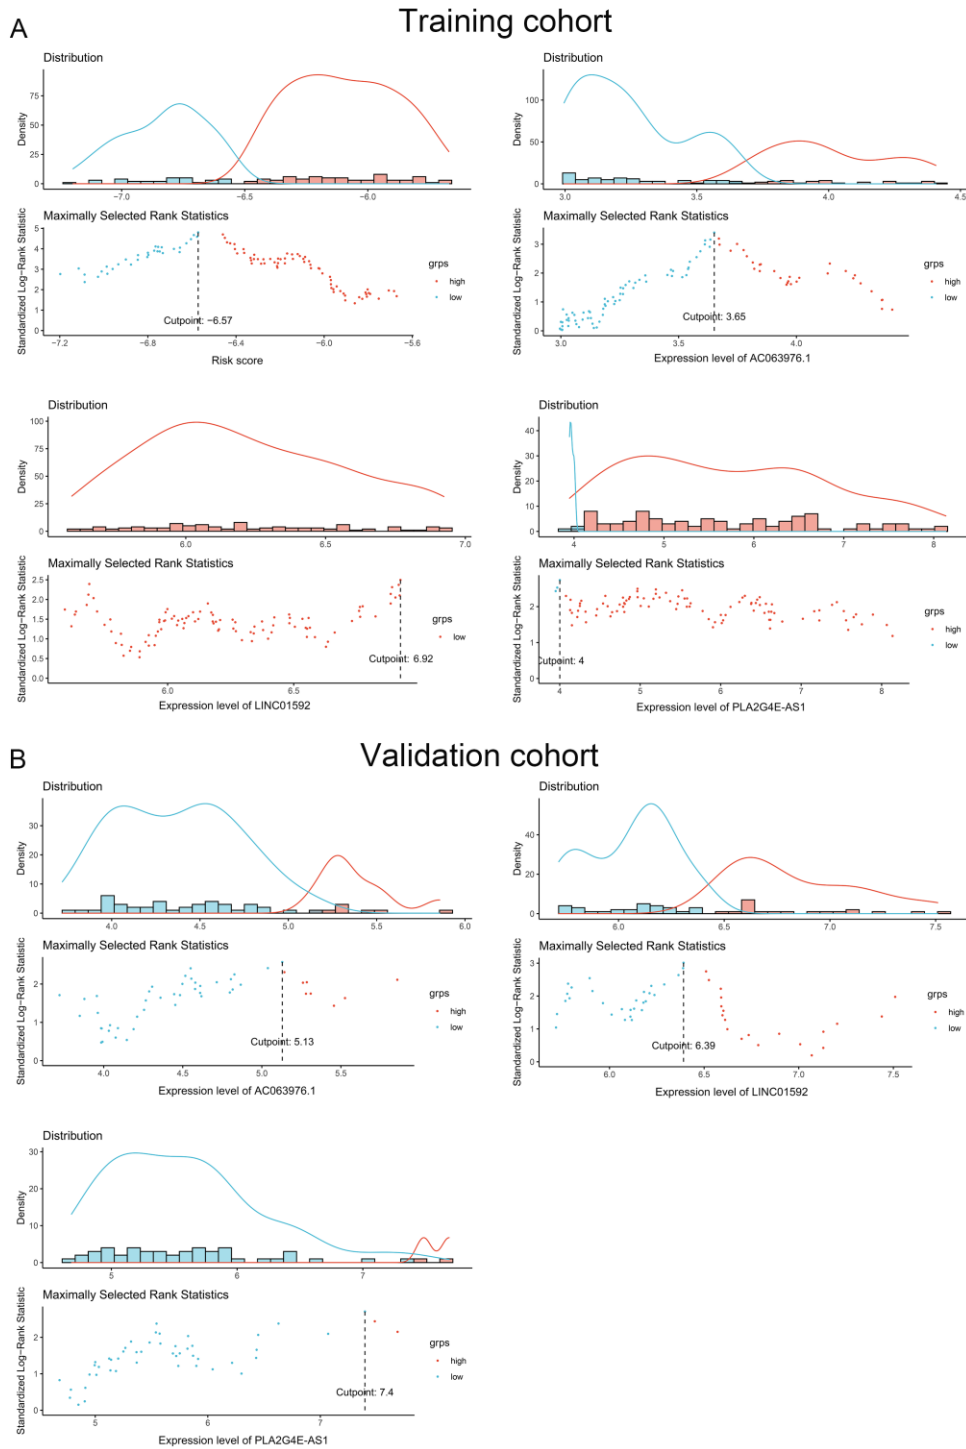

**Fig. S1.** The optimal cut-points for risk score, AC063976.1, LINC01592, and PLA2G4E-AS1 in the training (A) and validation (B) cohorts.

**Table S1.** Clinical characteristics of ESCC patients.

| <b>Variables</b> | <b>Training cohort, n (%)</b> | <b>Validation cohort, n (%)</b> | <b>P-value</b> |
|------------------|-------------------------------|---------------------------------|----------------|
| Number           | 119                           | 60                              | NA             |
| Age, years       |                               |                                 | 0.393          |
| ≤ 60             | 69 (58.0)                     | 30 (50.0)                       |                |
| > 60             | 50 (42.0)                     | 30 (50.0)                       |                |
| Gender           |                               |                                 | 0.858          |
| Female           | 21 (17.6)                     | 12 (20.0)                       |                |
| Male             | 88 (82.4)                     | 48 (80.0)                       |                |
| T                |                               |                                 | 0.546          |
| T1-2             | 28 (23.5)                     | 11 (18.3)                       |                |
| T3-4             | 91 (76.5)                     | 49 (81.7)                       |                |
| N                |                               |                                 | 0.829          |
| N0               | 54 (45.4)                     | 29 (48.3)                       |                |
| N1-3             | 65 (54.6)                     | 31 (51.7)                       |                |
| TNM stage        |                               |                                 | 0.169          |
| I/II             | 53 (44.5)                     | 34 (56.7)                       |                |
| III/IV           | 66 (55.5)                     | 26 (43.3)                       |                |
| Tumor grade      |                               |                                 | 0.612          |
| Well             | 23 (19.3)                     | 9 (15.0)                        |                |
| Moderate/poor    | 96 (80.7)                     | 51 (85.0)                       |                |

NA, not available; N, lymph node metastasis; T, tumor invasion depth; TNM stage, the Tumor, Node, Metastasis stage.

**Table S2.** The points for nomogram model.

| Variables           | Points | OS time | OS rate | Total points |
|---------------------|--------|---------|---------|--------------|
| Risk stratification |        | 1 year  |         |              |
| Low risk            | 0      |         | 0.95    | 15           |
| High risk           | 100    |         | 0.90    | 68           |
| Age, years          |        |         | 0.85    | 99           |
| ≤ 60                | 0      |         | 0.80    | 123          |
| > 60                | 43     |         | 0.70    | 157          |
| TNM stage           |        |         | 0.60    | 183          |
| I/II                | 0      | 2 year  |         |              |
| III/IV              | 52     |         | 0.90    | 4            |
|                     |        |         | 0.85    | 35           |
|                     |        |         | 0.80    | 58           |
|                     |        |         | 0.70    | 93           |
|                     |        |         | 0.60    | 119          |
|                     |        |         | 0.50    | 141          |
|                     |        |         | 0.40    | 161          |
|                     |        |         | 0.30    | 181          |
|                     |        | 3 year  |         |              |
|                     |        |         | 0.85    | 4            |
|                     |        |         | 0.80    | 27           |
|                     |        |         | 0.70    | 62           |
|                     |        |         | 0.60    | 88           |
|                     |        |         | 0.50    | 110          |
|                     |        |         | 0.40    | 131          |
|                     |        |         | 0.30    | 150          |
|                     |        |         | 0.20    | 172          |
|                     |        |         | 0.10    | 198          |
|                     |        | 4 year  |         |              |
|                     |        |         | 0.80    | 17           |
|                     |        |         | 0.70    | 51           |
|                     |        |         | 0.60    | 77           |
|                     |        |         | 0.50    | 99           |

---

|      |     |
|------|-----|
| 0.40 | 120 |
|------|-----|

|      |     |
|------|-----|
| 0.30 | 140 |
|------|-----|

|      |     |
|------|-----|
| 0.20 | 161 |
|------|-----|

|      |     |
|------|-----|
| 0.10 | 187 |
|------|-----|

---
